# Supplementary material for: Structure of the intergenic spacers in chicken ribosomal DNA
Source: Genet Sel Evol. 2019 Oct 26;51:59. doi: 10.1186/s12711-019-0501-7 (PMC6815422; doi:10.1186/s12711-019-0501-7)
Supplement: Supplementary file 2 — Additional file 2: Table S1. Identification of the best evolutionary model for the description of sequence evolution in Elena (EL) repeats. [file 12711_2019_501_MOESM2_ESM.xlsx]

## Sheet: Info
Elena repeats - search of the best evolution model	#Param	BIC	AICc	lnL	Invariant	Gamma	R	Freq A	Freq T	Freq C	Freq G	A=>T	A=>C	A=>G	T=>A	T=>C	T=>G	C=>A	C=>T	C=>G	G=>A	G=>T	G=>C
K2+G	717	10838.6	4835.77	-1685.13	n/a	2.6521	0.936565	0.25	0.25	0.25	0.25	0.06	0.06	0.12	0.06	0.12	0.06	0.06	0.12	0.06	0.12	0.06	0.06
K2+G+I	718	10848	4836.84	-1684.62	0	2.56993	0.9273	0.25	0.25	0.25	0.25	0.06	0.06	0.12	0.06	0.12	0.06	0.06	0.12	0.06	0.12	0.06	0.06
JC+G	716	10855.6	4861.17	-1698.87	n/a	2.58029	0.5	0.25	0.25	0.25	0.25	0.08	0.08	0.08	0.08	0.08	0.08	0.08	0.08	0.08	0.08	0.08	0.08
K2	716	10856.7	4862.26	-1699.42	n/a	n/a	0.920832	0.25	0.25	0.25	0.25	0.07	0.07	0.12	0.07	0.12	0.07	0.07	0.12	0.07	0.12	0.07	0.07
K2+I	717	10858.9	4856.09	-1695.29	0.0820106	n/a	0.933593	0.25	0.25	0.25	0.25	0.06	0.06	0.12	0.06	0.12	0.06	0.06	0.12	0.06	0.12	0.06	0.06
JC+G+I	717	10862.4	4859.61	-1697.05	1e-05	2.57586	0.5	0.25	0.25	0.25	0.25	0.08	0.08	0.08	0.08	0.08	0.08	0.08	0.08	0.08	0.08	0.08	0.08
JC	715	10871.1	4885.01	-1711.84	n/a	n/a	0.5	0.25	0.25	0.25	0.25	0.08	0.08	0.08	0.08	0.08	0.08	0.08	0.08	0.08	0.08	0.08	0.08
JC+I	716	10874.2	4879.73	-1708.15	0.0818951	n/a	0.5	0.25	0.25	0.25	0.25	0.08	0.08	0.08	0.08	0.08	0.08	0.08	0.08	0.08	0.08	0.08	0.08
T92+G	718	10879.7	4868.63	-1700.51	n/a	2.17564	1.02412	0.143362	0.143362	0.356638	0.356638	0.03	0.08	0.2	0.03	0.2	0.08	0.03	0.08	0.08	0.08	0.03	0.08
T92+G+I	719	10890.2	4870.75	-1700.53	0.00056044	2.18184	1.02413	0.143362	0.143362	0.356638	0.356638	0.03	0.08	0.2	0.03	0.2	0.08	0.03	0.08	0.08	0.08	0.03	0.08
HKY+G	720	10896	4868.2	-1698.21	n/a	2.1599	1.02389	0.145788	0.140936	0.392681	0.320595	0.03	0.09	0.18	0.03	0.22	0.07	0.03	0.08	0.07	0.08	0.03	0.09
GTR+G	724	10904.6	4843.5	-1681.68	n/a	1.96604	0.72494	0.145788	0.140936	0.392681	0.320595	0.09	0.11	0.14	0.09	0.16	0.08	0.04	0.06	0.05	0.07	0.04	0.06
HKY+G+I	721	10908.8	4872.66	-1699.39	0.00281681	2.19132	1.02384	0.145788	0.140936	0.392681	0.320595	0.03	0.09	0.18	0.03	0.22	0.07	0.03	0.08	0.07	0.08	0.03	0.09
T92	717	10910.6	4907.79	-1721.14	n/a	n/a	0.965068	0.143362	0.143362	0.356638	0.356638	0.03	0.08	0.19	0.03	0.19	0.08	0.03	0.08	0.08	0.08	0.03	0.08
T92+I	718	10912.8	4901.72	-1717.06	0.0798236	n/a	0.95973	0.143362	0.143362	0.356638	0.356638	0.03	0.08	0.19	0.03	0.19	0.08	0.03	0.08	0.08	0.08	0.03	0.08
TN93+G+I	722	10916.7	4872.25	-1698.15	0.00964051	2.2532	1.0345	0.145788	0.140936	0.392681	0.320595	0.03	0.09	0.15	0.03	0.25	0.07	0.03	0.09	0.07	0.07	0.03	0.09
GTR+G+I	725	10917	4847.55	-1682.66	0.00614244	2.02746	0.72712	0.145788	0.140936	0.392681	0.320595	0.09	0.11	0.14	0.09	0.17	0.08	0.04	0.06	0.05	0.07	0.04	0.06
TN93+G	721	10924.7	4888.59	-1707.36	n/a	2.13335	1.03736	0.145788	0.140936	0.392681	0.320595	0.03	0.09	0.15	0.03	0.25	0.07	0.03	0.09	0.07	0.07	0.03	0.09
HKY	719	10927.3	4907.91	-1719.11	n/a	n/a	0.963717	0.145788	0.140936	0.392681	0.320595	0.03	0.09	0.17	0.03	0.21	0.07	0.03	0.08	0.07	0.08	0.03	0.09
HKY+I	720	10933.3	4905.5	-1716.86	0.079681	n/a	0.962343	0.145788	0.140936	0.392681	0.320595	0.03	0.09	0.17	0.03	0.21	0.07	0.03	0.08	0.07	0.08	0.03	0.09
TN93	720	10936.1	4908.33	-1718.28	n/a	n/a	0.96377	0.145788	0.140936	0.392681	0.320595	0.03	0.09	0.15	0.03	0.23	0.07	0.03	0.08	0.07	0.07	0.03	0.09
GTR	723	10937.7	4884.93	-1703.44	n/a	n/a	0.956318	0.145788	0.140936	0.392681	0.320595	0.07	0.11	0.14	0.07	0.22	0.08	0.04	0.08	0.04	0.06	0.04	0.05
TN93+I	721	10941.8	4905.67	-1715.9	0.0801443	n/a	0.966669	0.145788	0.140936	0.392681	0.320595	0.03	0.09	0.15	0.03	0.24	0.07	0.03	0.08	0.07	0.07	0.03	0.09
GTR+I	724	10942.2	4881.17	-1700.52	0.0753882	n/a	0.738392	0.145788	0.140936	0.392681	0.320595	0.08	0.11	0.14	0.08	0.18	0.08	0.04	0.06	0.06	0.06	0.04	0.07

## Sheet: Caption
Table. Maximum Likelihood fits of 24 different nucleotide substitution models
NOTE.-- Models with the lowest BIC scores (Bayesian Information Criterion) are considered to describe the substitution pattern the best. For each model, AICc value (Akaike Information Criterion, corrected), Maximum Likelihood value (lnL), and the number of parameters (including branch lengths) are also presented [1]. Non-uniformity of evolutionary rates among sites may be modeled by using a discr…
Abbreviations: GTR: General Time Reversible; HKY: Hasegawa-Kishino-Yano; TN93: Tamura-Nei; T92: Tamura 3-parameter; K2: Kimura 2-parameter; JC: Jukes-Cantor.
1. Nei M. and Kumar S. (2000). Molecular Evolution and Phylogenetics. Oxford University Press, New York.
2. Kumar S., Stecher G., and Tamura K. (2016). MEGA7: Molecular Evolutionary Genetics Analysis version 7.0 for bigger datasets.Molecular Biology and Evolution 33:1870-1874.
Disclaimer: Although utmost care has been taken to ensure the correctness of the caption, the caption text is provided "as is" without any warranty of any kind. Authors advise the user to carefully check the caption prior to its use for any purpose and report any errors or problems to the authors immediately (www.megasoftware.net). In no event shall the authors and their employers be liable for a…

## Sheet: K2+G
From\To	A	T	C	G
A	-	0.0645473	0.0645473	0.120905
T	0.0645473	-	0.120905	0.0645473
C	0.0645473	0.120905	-	0.0645473
G	0.120905	0.0645473	0.0645473	-

## Sheet: K2+G+I
From\To	A	T	C	G
A	-	0.0648576	0.0648576	0.120285
T	0.0648576	-	0.120285	0.0648576
C	0.0648576	0.120285	-	0.0648576
G	0.120285	0.0648576	0.0648576	-

## Sheet: JC+G
From\To	A	T	C	G
A	-	0.0833333	0.0833333	0.0833333
T	0.0833333	-	0.0833333	0.0833333
C	0.0833333	0.0833333	-	0.0833333
G	0.0833333	0.0833333	0.0833333	-

## Sheet: K2
From\To	A	T	C	G
A	-	0.065076	0.065076	0.119848
T	0.065076	-	0.119848	0.065076
C	0.065076	0.119848	-	0.065076
G	0.119848	0.065076	0.065076	-

## Sheet: K2+I
From\To	A	T	C	G
A	-	0.0646465	0.0646465	0.120707
T	0.0646465	-	0.120707	0.0646465
C	0.0646465	0.120707	-	0.0646465
G	0.120707	0.0646465	0.0646465	-

## Sheet: JC+G+I
From\To	A	T	C	G
A	-	0.0833333	0.0833333	0.0833333
T	0.0833333	-	0.0833333	0.0833333
C	0.0833333	0.0833333	-	0.0833333
G	0.0833333	0.0833333	0.0833333	-

## Sheet: JC
From\To	A	T	C	G
A	-	0.0833333	0.0833333	0.0833333
T	0.0833333	-	0.0833333	0.0833333
C	0.0833333	0.0833333	-	0.0833333
G	0.0833333	0.0833333	0.0833333	-

## Sheet: JC+I
From\To	A	T	C	G
A	-	0.0833333	0.0833333	0.0833333
T	0.0833333	-	0.0833333	0.0833333
C	0.0833333	0.0833333	-	0.0833333
G	0.0833333	0.0833333	0.0833333	-

[truncated: 16 more sheets: T92+G, T92+G+I, HKY+G, GTR+G, HKY+G+I, T92, T92+I, TN93+G+I, GTR+G+I, TN93+G, HKY, HKY+I, TN93, GTR, TN93+I, GTR+I]
