# Supplementary material for: Structure of the intergenic spacers in chicken ribosomal DNA
Source: Genet Sel Evol. 2019 Oct 26;51:59. doi: 10.1186/s12711-019-0501-7 (PMC6815422; doi:10.1186/s12711-019-0501-7)
Supplement: Supplementary file 3 — Additional file 3: Table S2. Identification of the best evolutionary model for the description of sequence evolution in Valerie (VAL) repeats. [file 12711_2019_501_MOESM3_ESM.xlsx]

## Sheet: Info
Valerie repeats - search of the best evolution model	#Param	BIC	AICc	lnL	Invariant	Gamma	R	Freq A	Freq T	Freq C	Freq G	A=>T	A=>C	A=>G	T=>A	T=>C	T=>G	C=>A	C=>T	C=>G	G=>A	G=>T	G=>C
JC+G	190	3961.57	2629.75	-1120.54	n/a	1.62456	0.5	0.25	0.25	0.25	0.25	0.08	0.08	0.08	0.08	0.08	0.08	0.08	0.08	0.08	0.08	0.08	0.08
JC+G+I	191	3970.62	2631.84	-1120.54	9.99e-06	1.62463	0.5	0.25	0.25	0.25	0.25	0.08	0.08	0.08	0.08	0.08	0.08	0.08	0.08	0.08	0.08	0.08	0.08
K2+G	191	3972.05	2633.27	-1121.25	n/a	1.49699	1.38947	0.25	0.25	0.25	0.25	0.05	0.05	0.15	0.05	0.15	0.05	0.05	0.15	0.05	0.15	0.05	0.05
T92+G	192	3974.89	2629.15	-1118.15	n/a	1.61604	0.963813	0.120168	0.120168	0.379832	0.379832	0.03	0.08	0.22	0.03	0.22	0.08	0.03	0.07	0.08	0.07	0.03	0.08
JC+I	190	3980.7	2648.88	-1130.11	0.125245	n/a	0.5	0.25	0.25	0.25	0.25	0.08	0.08	0.08	0.08	0.08	0.08	0.08	0.08	0.08	0.08	0.08	0.08
K2+G+I	192	3982.24	2636.49	-1121.82	0	1.49018	1.4242	0.25	0.25	0.25	0.25	0.05	0.05	0.15	0.05	0.15	0.05	0.05	0.15	0.05	0.15	0.05	0.05
T92+G+I	193	3983.95	2631.24	-1118.15	0.00223438	1.63316	0.963992	0.120168	0.120168	0.379832	0.379832	0.03	0.08	0.22	0.03	0.22	0.08	0.03	0.07	0.08	0.07	0.03	0.08
JC	189	3984.4	2659.54	-1136.48	n/a	n/a	0.5	0.25	0.25	0.25	0.25	0.08	0.08	0.08	0.08	0.08	0.08	0.08	0.08	0.08	0.08	0.08	0.08
GTR+G	198	3987.34	2599.83	-1097.21	n/a	1.9144	0.710933	0.0889875	0.151349	0.348476	0.411188	0.06	0.13	0.19	0.04	0.15	0.15	0.03	0.07	0.05	0.04	0.05	0.04
HKY+G	194	3989.54	2629.88	-1116.42	n/a	1.71145	0.94601	0.0889875	0.151349	0.348476	0.411188	0.03	0.07	0.23	0.02	0.2	0.09	0.02	0.09	0.09	0.05	0.03	0.07
K2+I	191	3991.58	2652.8	-1131.02	0.128397	n/a	1.34481	0.25	0.25	0.25	0.25	0.05	0.05	0.14	0.05	0.14	0.05	0.05	0.14	0.05	0.14	0.05	0.05
T92+I	192	3992.19	2646.45	-1126.8	0.115721	n/a	0.919871	0.120168	0.120168	0.379832	0.379832	0.03	0.08	0.21	0.03	0.21	0.08	0.03	0.07	0.08	0.07	0.03	0.08
GTR+I	198	3993.01	2605.5	-1100.04	0.0921087	n/a	0.888438	0.0889875	0.151349	0.348476	0.411188	0.05	0.14	0.25	0.03	0.14	0.13	0.04	0.06	0.03	0.05	0.05	0.03
K2	190	3995.38	2663.56	-1137.45	n/a	n/a	1.31604	0.25	0.25	0.25	0.25	0.05	0.05	0.14	0.05	0.14	0.05	0.05	0.14	0.05	0.14	0.05	0.05
GTR+G+I	199	3995.52	2601.05	-1096.77	0.0355257	2.34918	0.718029	0.0889875	0.151349	0.348476	0.411188	0.06	0.13	0.19	0.04	0.15	0.15	0.03	0.07	0.05	0.04	0.05	0.04
TN93+G	195	3996.81	2630.18	-1115.52	n/a	1.88181	0.92548	0.0889875	0.151349	0.348476	0.411188	0.03	0.07	0.28	0.02	0.16	0.09	0.02	0.07	0.09	0.06	0.03	0.07
HKY+G+I	195	3998.6	2631.97	-1116.42	0.00583068	1.76016	0.946537	0.0889875	0.151349	0.348476	0.411188	0.03	0.07	0.23	0.02	0.2	0.09	0.02	0.09	0.09	0.05	0.03	0.07
T92	191	3998.76	2659.97	-1134.61	n/a	n/a	0.882816	0.120168	0.120168	0.379832	0.379832	0.03	0.09	0.21	0.03	0.21	0.09	0.03	0.07	0.09	0.07	0.03	0.09
HKY+I	194	4005.19	2645.52	-1124.24	0.116239	n/a	0.919252	0.0889875	0.151349	0.348476	0.411188	0.03	0.08	0.23	0.02	0.2	0.09	0.02	0.09	0.09	0.05	0.03	0.08
GTR	197	4005.85	2625.3	-1110.99	n/a	n/a	0.654146	0.0889875	0.151349	0.348476	0.411188	0.06	0.16	0.21	0.03	0.13	0.13	0.04	0.06	0.06	0.04	0.05	0.05
TN93+G+I	196	4005.86	2632.27	-1115.52	1e-05	1.8819	0.925481	0.0889875	0.151349	0.348476	0.411188	0.03	0.07	0.28	0.02	0.16	0.09	0.02	0.07	0.09	0.06	0.03	0.07
TN93+I	195	4010.08	2643.45	-1122.16	0.111531	n/a	0.905276	0.0889875	0.151349	0.348476	0.411188	0.03	0.08	0.29	0.02	0.15	0.09	0.02	0.07	0.09	0.06	0.03	0.08
HKY	193	4011.03	2658.33	-1131.69	n/a	n/a	0.886037	0.0889875	0.151349	0.348476	0.411188	0.03	0.08	0.23	0.02	0.19	0.09	0.02	0.08	0.09	0.05	0.03	0.08
TN93	194	4011.79	2652.12	-1127.54	n/a	n/a	0.899546	0.0889875	0.151349	0.348476	0.411188	0.03	0.07	0.31	0.02	0.14	0.09	0.02	0.06	0.09	0.07	0.03	0.07

## Sheet: Caption
Table. Maximum Likelihood fits of 24 different nucleotide substitution models
NOTE.-- Models with the lowest BIC scores (Bayesian Information Criterion) are considered to describe the substitution pattern the best. For each model, AICc value (Akaike Information Criterion, corrected), Maximum Likelihood value (lnL), and the number of parameters (including branch lengths) are also presented [1]. Non-uniformity of evolutionary rates among sites may be modeled by using a discr…
Abbreviations: GTR: General Time Reversible; HKY: Hasegawa-Kishino-Yano; TN93: Tamura-Nei; T92: Tamura 3-parameter; K2: Kimura 2-parameter; JC: Jukes-Cantor.
1. Nei M. and Kumar S. (2000). Molecular Evolution and Phylogenetics. Oxford University Press, New York.
2. Kumar S., Stecher G., and Tamura K. (2016). MEGA7: Molecular Evolutionary Genetics Analysis version 7.0 for bigger datasets.Molecular Biology and Evolution 33:1870-1874.
Disclaimer: Although utmost care has been taken to ensure the correctness of the caption, the caption text is provided "as is" without any warranty of any kind. Authors advise the user to carefully check the caption prior to its use for any purpose and report any errors or problems to the authors immediately (www.megasoftware.net). In no event shall the authors and their employers be liable for a…

## Sheet: JC+G
From\To	A	T	C	G
A	-	0.0833333	0.0833333	0.0833333
T	0.0833333	-	0.0833333	0.0833333
C	0.0833333	0.0833333	-	0.0833333
G	0.0833333	0.0833333	0.0833333	-

## Sheet: JC+G+I
From\To	A	T	C	G
A	-	0.0833333	0.0833333	0.0833333
T	0.0833333	-	0.0833333	0.0833333
C	0.0833333	0.0833333	-	0.0833333
G	0.0833333	0.0833333	0.0833333	-

## Sheet: K2+G
From\To	A	T	C	G
A	-	0.0523129	0.0523129	0.145374
T	0.0523129	-	0.145374	0.0523129
C	0.0523129	0.145374	-	0.0523129
G	0.145374	0.0523129	0.0523129	-

## Sheet: T92+G
From\To	A	T	C	G
A	-	0.0259011	0.0818691	0.216094
T	0.0259011	-	0.216094	0.0818691
C	0.0259011	0.068366	-	0.0818691
G	0.068366	0.0259011	0.0818691	-

## Sheet: JC+I
From\To	A	T	C	G
A	-	0.0833333	0.0833333	0.0833333
T	0.0833333	-	0.0833333	0.0833333
C	0.0833333	0.0833333	-	0.0833333
G	0.0833333	0.0833333	0.0833333	-

## Sheet: K2+G+I
From\To	A	T	C	G
A	-	0.0515633	0.0515633	0.146873
T	0.0515633	-	0.146873	0.0515633
C	0.0515633	0.146873	-	0.0515633
G	0.146873	0.0515633	0.0515633	-

## Sheet: T92+G+I
From\To	A	T	C	G
A	-	0.0258984	0.0818605	0.216111
T	0.0258984	-	0.216111	0.0818605
C	0.0258984	0.0683715	-	0.0818605
G	0.0683715	0.0258984	0.0818605	-

## Sheet: JC
From\To	A	T	C	G
A	-	0.0833333	0.0833333	0.0833333
T	0.0833333	-	0.0833333	0.0833333
C	0.0833333	0.0833333	-	0.0833333
G	0.0833333	0.0833333	0.0833333	-

[truncated: 16 more sheets: GTR+G, HKY+G, K2+I, T92+I, GTR+I, K2, GTR+G+I, TN93+G, HKY+G+I, T92, HKY+I, GTR, TN93+G+I, TN93+I, HKY, TN93]
