# Supplementary material for: Structure of the intergenic spacers in chicken ribosomal DNA
Source: Genet Sel Evol. 2019 Oct 26;51:59. doi: 10.1186/s12711-019-0501-7 (PMC6815422; doi:10.1186/s12711-019-0501-7)
Supplement: Supplementary file 5 — Additional file 5: Table S3. Sequence variants of three chicken rRNA clusters from WAG137G04 BAC clone with coordinates, numbers, types, and variant frequencies per kilobases. [file 12711_2019_501_MOESM5_ESM.xlsx]

## Sheet: Variants in rRNA cluster
Sequence variants observed in three chicken rRNA clusters cloned in the WAG137G04 BAC-clone
Position in consensus from pre-rRNA 1-3	Position in pre-rRNA 1	Position in pre-rRNA 2	Position in pre-rRNA 3	Within-region coordinates	region	Position in reference KT445937	type	reference allele	alternative
248	1427	35925	62925	248	5'ETS	248	SNP	A	G
293	1472	35970	62970	293	5'ETS	293	Indel	G------	GGAGAGA
685	1858	36362	63356	685	5'ETS	685	SNP	T	C
694	1867	36371	63365	695	5'ETS	694	Indel	TC	T-
774	1947	36451	63444	774	5'ETS	774	SNP	T	C
1031	2204	36708	63701	1031	5'ETS	1031	SNP	T	C
1048	2221	36725	63718	1048	5'ETS	1031	SNP	G	A
1160	2333	36837	63830	1161	5'ETS	1160	Indel	CAGA	C---
1422	2595	37099	64089	1422	5'ETS	1422	SNP	G	A
1437	2610	37114	64104	1437	5'ETS	1437	SNP	C	T
1530	2703	37207	64197	1530	5'ETS	1530	Indel	C-	CG
1648	2820	37325	64314	1649	5'ETS	1648	Indel	GGCGA	G-----
2966	4138	38639	65632	1121	18S	2966	Indel	CG	C-
3656	4828	39329	66321	1811	18S	3646	SNP	G	C
3874	5046	39547	66539	206	ITS1	3874	Indel	CG	C-
3921	5092	39594	66586	253	ITS1	3908	Indel	TC	T-
5789	6960	41461	68454	2121	ITS1	5777	Indel	C---	CGCG
5990	7158	41659	68655	2322	ITS1	5978	Indel	T----	TGCCG
6145	7313	41810	68802	2477	ITS1	6146	SNP	G	A
6170	7338	41835	68827	2502	ITS1	6154	Indel	TC	T-
6455	7623	42119	69112	93	ITS2	6439	Indel	CGA	C---
6730	7898	42392	69387	368	ITS2	6710	Indel	GC	G-
6937	8105	42598	69594	575	ITS2	6917	Indel	CCGG	C---
7668	8836	43326	70325	566	28S	7645	Indel	AG	A-
7907	9075	43564	70564	805	28S	7884	Indel	GC	G-
8039	9207	43695	70696	937	28S	8017	SNP	G	C
8040	9208	43696	70697	938	28S	8018	SNP	C	G
9405	10573	45061	72062	2303	28S	9383	SNP	A	G/-
9971	11139	45626	72628	2869	28S	9950	Indel	GC	G-
10040	11207	45695	72697	2938	28S	10019	Indel	C-----	CGCGAG
10263	11430	45913	72915	3161	28S	10238	Indel	ACGCGATGTGATTTCTGCCCAGTG	A-----------------------
11778	12945	47405	74430	233	3'ETS	11753	SNP	C	T
11823	12990	47450	74475	278	3'ETS	11798	Indel	T---	TGGC
pre-RNA1, pre-RNA2, pre-RNA3 - rRNA clusters
A summary of distribution of variants in the chicken rRNA cluster and their frequencies per kilobases.
Region	bp	kb	All variants	Variants/kb	Total variants (variants/kb)
5'ETS	1836	1.836	12	6.53595	12 (6,5)
18S	1823	1.823	2	1.09709	2 (1,1)
ITS1	2530	2.53	6	2.37154	6 (2,4)
5.8S	157	0.157	0	0	0 (0)
ITS2	733	0.733	3	4.09277	3 (4,1)
28S	4441	4.441	8	1.8014	8 (1,8)
3'ETS	343	0.343	2	5.8309	2 (5,8)
45S (total)	11863	11.863	33	2.78176	33 (2,8)
Variant breakdown into types
		Deletions		Insertions
Region	SNPs	Single nucleotide	Multiple nucleotide	Single nucleotide	Multiple nucleotide
5'ETS	7	1	2	1	1
18S	1	1	0	0	0
ITS1	1	3	0	0	2
5.8S	0	0	0	0	0
ITS2	0	1	2	0	0
28S	3	3	1	0	1
3'ETS	1	0	0	0	1
45S (total)	13	9	5	1	5
